# Supplementary material for: Needs Assessment for the Development of an Electronic Cross-Facility Health Record (ECHR) for Pediatric Palliative Care: A Design Thinking Approach
Source: MDPI journal article supplement (doi:10.3390/children8070602), 2021-07-16
Supplement: s1 [file s1]

24.11.2020  
World-Café  
ELSA-PP  
EFA

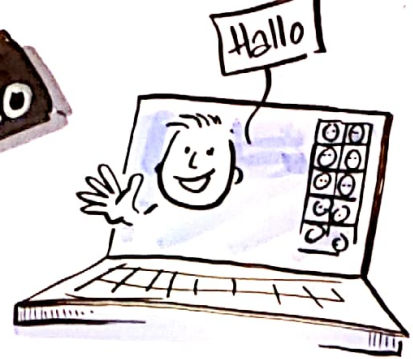

Das läuft gut:  
Informationsfluss  
persönlicher Austausch  
Netzwerk  
elektronische Dokumentation

WER IST DA EIGENTLICH INVOLVIERT?  
STAKEHOLDER  
AMBULANT  
STATIONÄR  
SONSTIGE

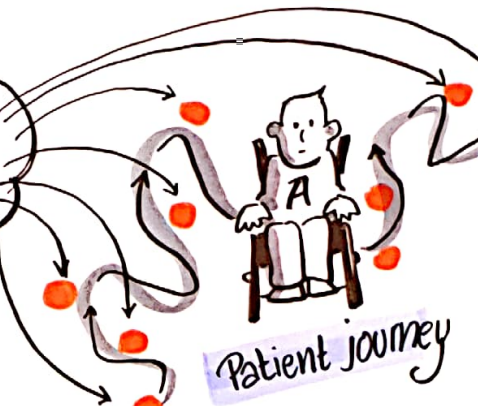

Das noch nicht so:  
Infoverluste  
Schnittstellen  
techn. Probleme  
Datenüberfluss  
Datenschutz

...und wer darf auf was zugreifen?  
Schreibrecht  
Lese-Recht  
Schweigepflicht!  
Eine Krankenkasse muss darf / soll nicht alles wissen  
Nachrichtenfunktion  
Schreibrecht ohne Einsicht

...und wer soll das entscheiden?  
Eltern  
Palliativdienst

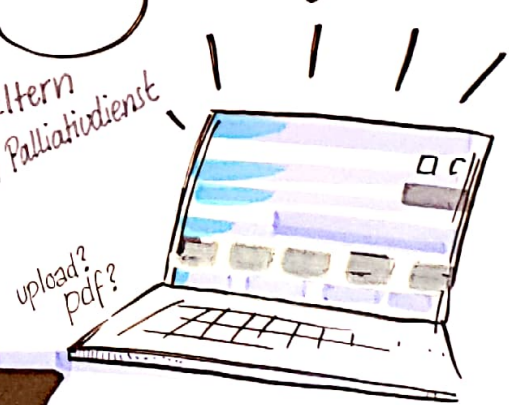

INHALTE  
Ist das so schon komplett?

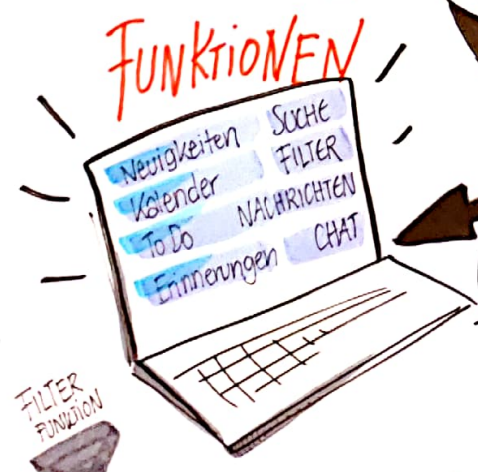

Ist das so sinnvoll?  
Chat?  
Das geht an ALLE?  
Zugriffsrechte?  
Teilnehmer bestimmen!  
Videokonferenz!

Widersprüche?  
Hilfsmittel?  
gemeinsame Krankenakte?  
fortlaufende Dokumentation?  
EVN / Notfallpläne an einem Ort / oder an zwei?

Suchlogik berücksichtigen  
FILTER FUNKTION

VORSICHT vor doppelter Buchführung

MEHR ALS EIN elektronischer AKTENORDNER

und weiter geht's...  
ZIEL



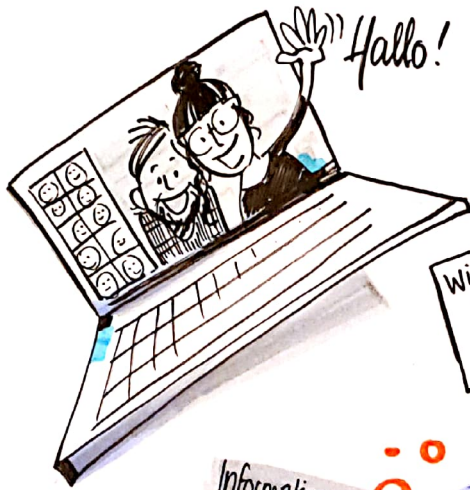

Wir befinden uns  
**HIER**

Fallbezogene Informationen

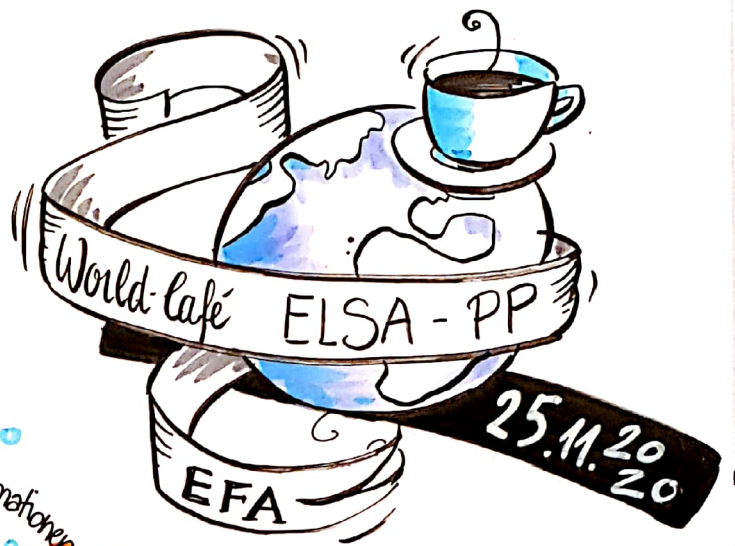

Informationsverlust

Datenüberfluss

Technische Probleme

Datenschutzbestimmung

erreichbar  
zeitnah  
direkt  
Netzwerk

WIR ENTWICKELN  
WEITER

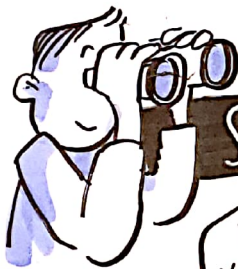

Wer sind die

**STAKEHOLDER**?

Wer ist der  
Inhaber  
der Akte?

persönlicher  
Kontakt  
bleibt wichtig

MDK Dolmetscher Notdienste  
Kranken-  
kassen Bildung  
einrichtung etc.

dürfen die Akte nicht einsehen !!

**EINBAHNSTR.**

nicht  
KOMPLETT  
freizugeben!

SCHREIBE  
RECHT

LESE  
RECHT

WER braucht WAS?

**FUNKTIONEN**

Kalender  
To Do  
Erinnerung

Neuigkeiten

Suchen

Filter

Nachrichten

Chat

**INHALTE**

**WO**  
liegt die Akte  
physisch?

**WER**  
HAT  
DIE  
**RECHTE**

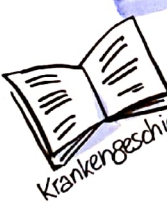

Physiotherapie  
Behandlungs-  
plan

aktuelle  
zusammen-  
fassung/  
Versorgung

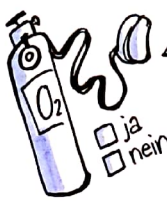

Bericht vom  
Pflegeteam

INDIVIDUELL  
konfigurierbar

für wen?  
adressieren

realen Fall  
durch  
spielen

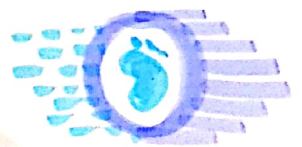



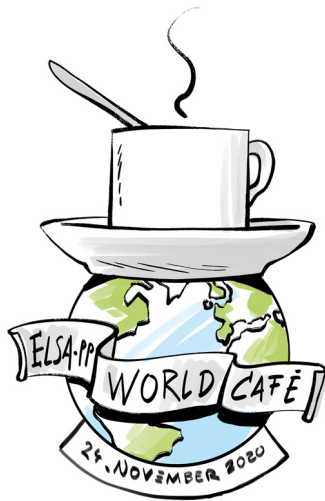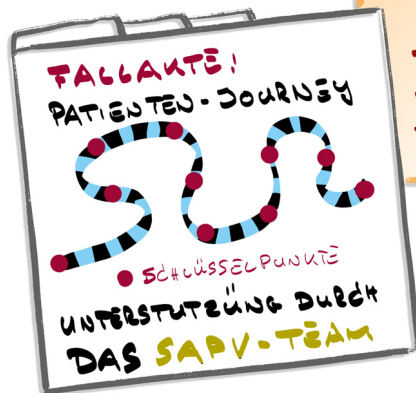

TECHNISCHE

PROBLEME

IST-ZUSTAND:

- DIREKT
- PERS. AUSTAUSCH
- KOMPLEX
- INFORMATIONS-VERLUST
- ↳ ANSCHNITT-STELLEN

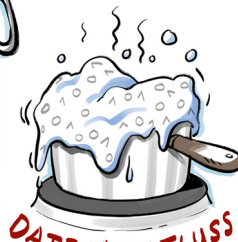

DATENÜBERFLUSS

EFA-WC-FUNKTIONEN

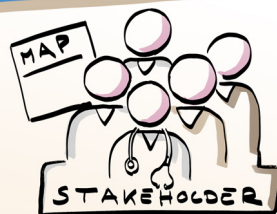

STAKEHOLDER

- AMBULANT
- STATIONÄR

ZUSÄTZLICHE EINSICHT:

- ELTERN
- PHYSIOTHERAPIE
- PATIENT
- GESETZL. BETREUER
- BEHÖRDEN/ÄMTER

↳ WER BRAUCHT

SCHREIBRECHTE

- ★ NIEDERGELEG. VERSORGER
- ★ SPZ
- ★ ÄRZTE
- ★ SAP
- ★ PALLIATIV-STATIONEN

INFO/EINBLICK

- KLINIKEN
- AMBULANZEN
- CASE MANAGEMENT
- HOSPIZE

PROTOTYP

WICHTIGES ZUSÄTZLICHE INHALTE:

- UNTERSUCHUNGSBEFUNDE?
- SORGERECHT
- ANSPRECH PARTNER

↳ KOPF-ZEILE?

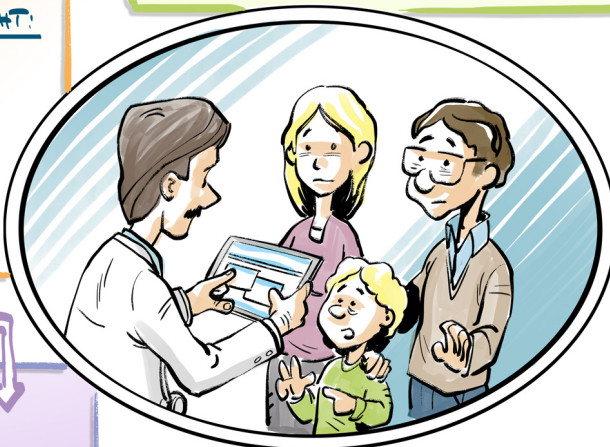

- PATIENTENAKTE: TÄGLICHE DOKUMENTATION
- FALLAKTE → EFA
- UPDATEN SICH GEGENSEITIG

MRS:

MULTIRESISTENTE ERREGER  
↳ DOKUMENTATION

WER LEGT DIE EFA AN?

WER VERWARTET DEN ZUGRIFF?

DATEN-SCHUTZ?

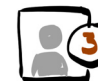

AKTUELLE BEFUNDE ANZEIGEN!

FUNKTIONEN:

- TO DO! (LISTE)
- ERINNERUNGEN

↳ SUCHEN

↳ FILTERN

↳ NACHRICHTEN VERSENDEN

↳ CHAT FUNKTION SINNVOLL?

↳ INFOS AN NICHT LESER-BERECHTIGTE VERSENDEN

NOTIZEN

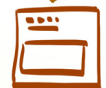

POP-UP

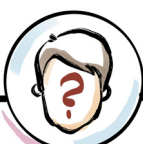

KOPFZEILE SOLL POPUP ÜBER BEHANDLER GEBEN!

GEPLANTE DIAGNOSTIK + THERAPIEN?

WIE GEHT ES WEITER??

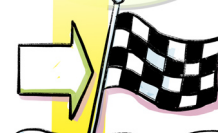

ABLAUF + ZIELE

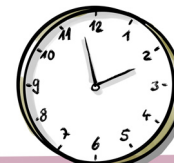

ZEITNAHE INFORMATIONEN - AKTUALISIERUNG

DATEN-SCHUTZ SICHER?

LISTE MIT VERSORGERN

RELEVANTE KÖNNEN AUFGERUFEN WERDEN

SIND SIE IM NETZ - WERKZEUG - GESCHALTET?

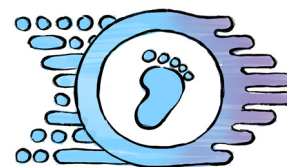

ELSA-PP

VISITEN-EINTRÄGE SINNVOLL?



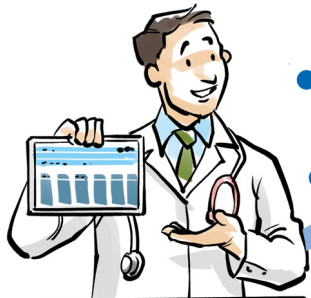

EPA - EFA

- ELEKTRONISCHE PATIENTEN - AKTE
- ELEKTRONISCHE FALL - AKTE

IST ZUSTAND:

- POSITIV:
- o INFO-FLUSS
  - o PERS. AUSTAUSCH
  - o ELEKTR. DOKUMENTATION

NEGATIV

- o INFO VERLUST (INTERSEKTIONAL)
- o INFO VERLUST AN SCHNITTSTELLEN
- o DATENÜBERFLUSS
- o TECHN. PROBLEME

KRITISCH:  
DATEN - SCHUTZ!  
§§

SAPV

WER FREI-  
GESCHACHT  
WIRD SOCH  
BESTIMMT  
WERDEN.  
ADMINISTRATION  
DER EFA??

PATIENTEN - REISE:  
AUSTAUSCH FALL-  
BEZOGENER INTOS

STAKEHOLDER  
ES FEHLEN:

- o THERAPEUTEN ✓
- o PATIENT ✓
- o ELTERN ✓

FALLAKTE  
INHALTE

- o KEINE EINSICHT FÜR X
- o KRAKEN KASSEN & X
- o DOLMETSCHER X
- o NOTDIENSTE X
- o BILDUNGS EINRICHTUNGEN

SCHREIB-  
RECHTE

- o FACHÄRZTE ★
- o PFLEGE ★
- o APOTHEKEN ★
- o KINDERHOSPITZ ★
- o KLINIKEN ★
- o CASE-MANAGEMENT ★

ABSPACHEN  
MIT ANDEREN  
BEHANDLERN

KLARERE  
ÜBERSICHT  
!!

WIE VERMEIDET  
MAN DATEN-  
FLUT?

BEZÜGLICH DER  
ZUGRIFFSRECHTE  
GIBT ES NOCH  
WEITEREN  
KLÄRUNGS -  
BEDARF !!

STAKE HOLDER

WIE WERDEN DIE  
ZUSTIMMUNGEN WERWACHT?

ZEIT-  
FENSTER:

VERFALLSDATUM  
FÜR FREIGABEN

ÜBERSICHTS-  
PROTOTYPEN:

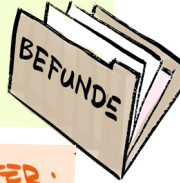

FEHLENDE REITER:

- o PHYSIOTHERAPIE
- o BEHANDLUNGS -  
PLANUNG
- o DIAGNOSTIK
- o THERAPIE
- o ALLERGIE
- o KRAKEN GESCHICHTE

NEWS!

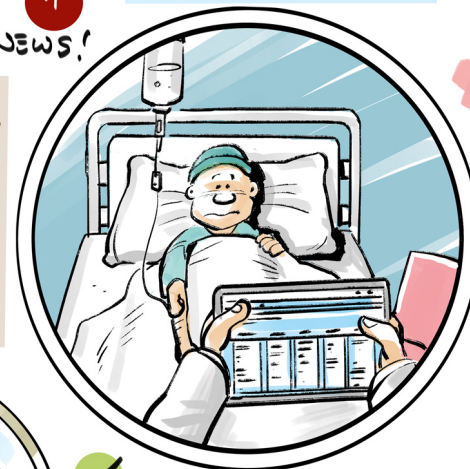

KONFIGURIERBARKEIT?

FUNKTIONEN:

NÜTZLICH WÄRE

- o MEHR PRAXIS -  
ZUSAMMEN SPIEL!
- o REAGER PATIENT  
MAL IN DER PRAXIS  
DURCH SPIELEN!
- o KOMPLEXITÄT DES  
ZUSAMMEN SPIELS  
WÄRE BESSER ER -  
KENNBAR
- o INTERNE NOTIZEN?

ANHÄNGUNG:

GRAPHIC RECORDINGS  
ALS BEIGABE FÜR  
TEILNEHMER?

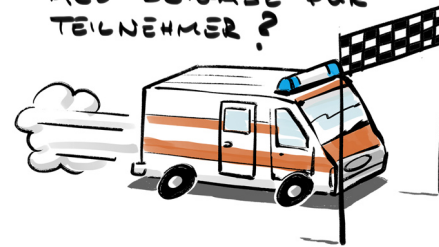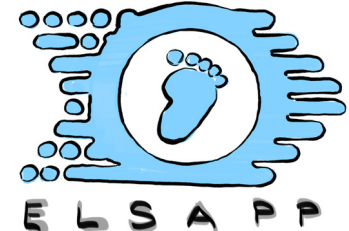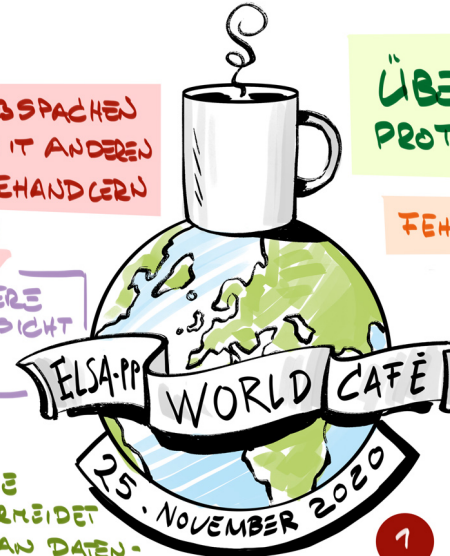

WICHTIGE  
ZEIT MOMENTE!
